# Supplementary material
Source: Research Square preprint supplement (doi:10.21203/rs.3.rs-8663890/v1)
Supplement: Supplementary file 1 [file 17130f6c1b677bf0bb66dfd1.xlsx]

## Sheet: Sheet1
Variable	Value	value choice
Preoperative PSA	0
Clinical stage T2	0	0 or 1
Clinical stage T3	0	0 or 1
Biopsy Gleason grade group 3	0	1 or 1
Biopsy Gleason grade group ≥4	0	0 or 1
Percentage of positive cores with highest-grade PCa	0	%
Percentage of positive cores with lower grade PCa	0	%
Logit Prediction	-3.9919
Predicted Probability of LNI	0.0181298
